# Supplementary material for: Experimental and theoretical investigation on the anti-corrosion characteristics of pyridine-substituted benzothiazole derivatives for mild steel in aqueous HCl
Source: Royal Society of Chemistry journal article supplement (doi:10.1039/d3cp01392h), 2023-01-01

**SUPPLEMENTARY INFORMATION (SI)**

**Experimental and theoretical investigation on anti-corrosion characteristics of Pyridine substituted benzothiazole derivatives for mild steel in aqueous HCl**

Fig. S1 A

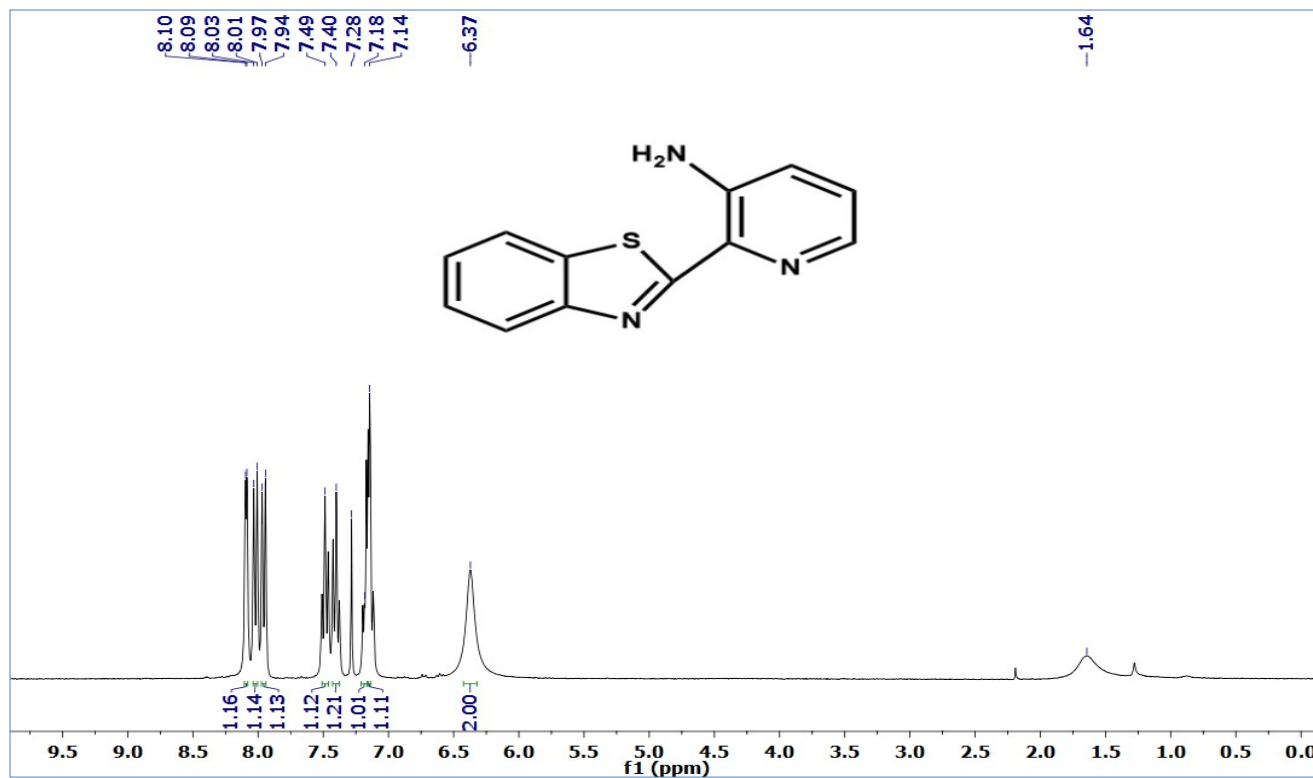

Fig. S1 B

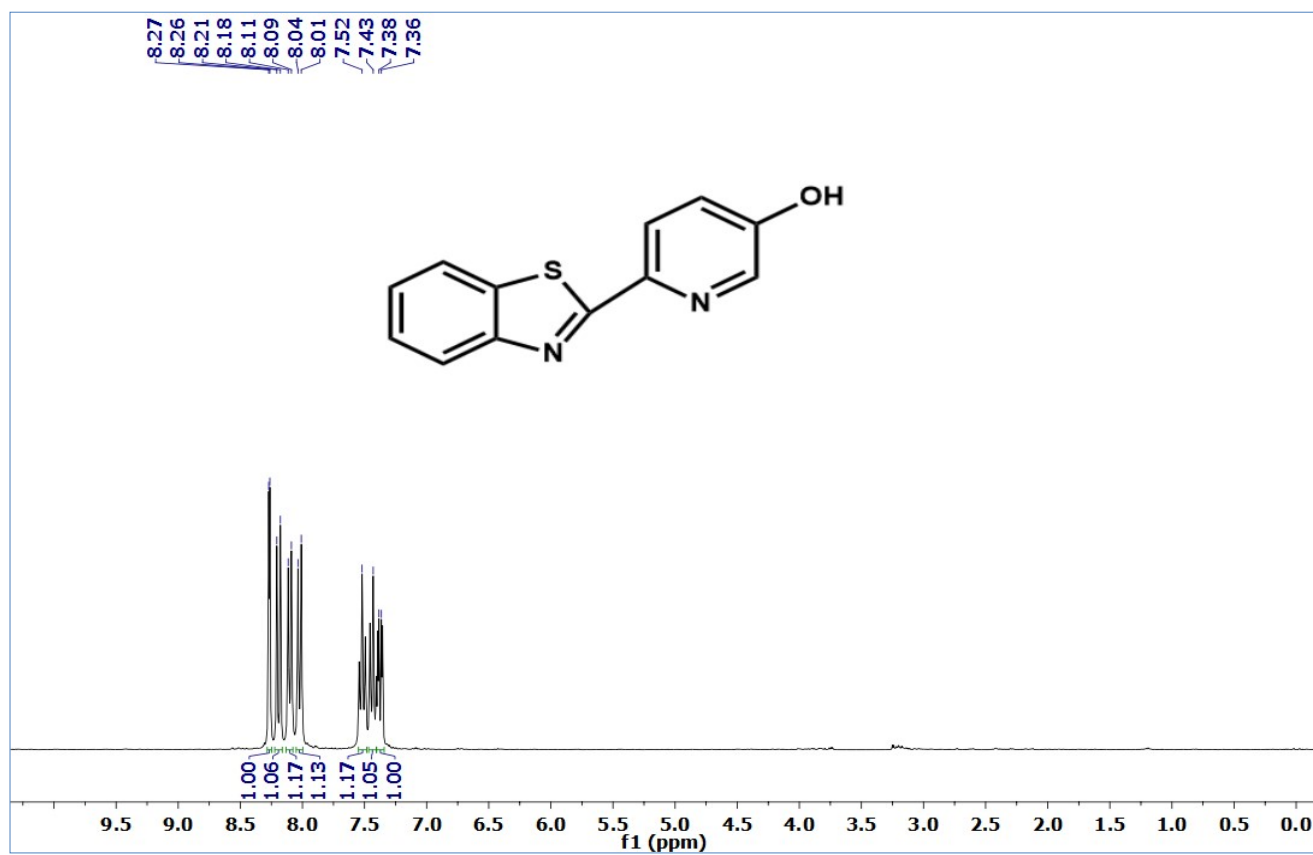

Fig. S1 C

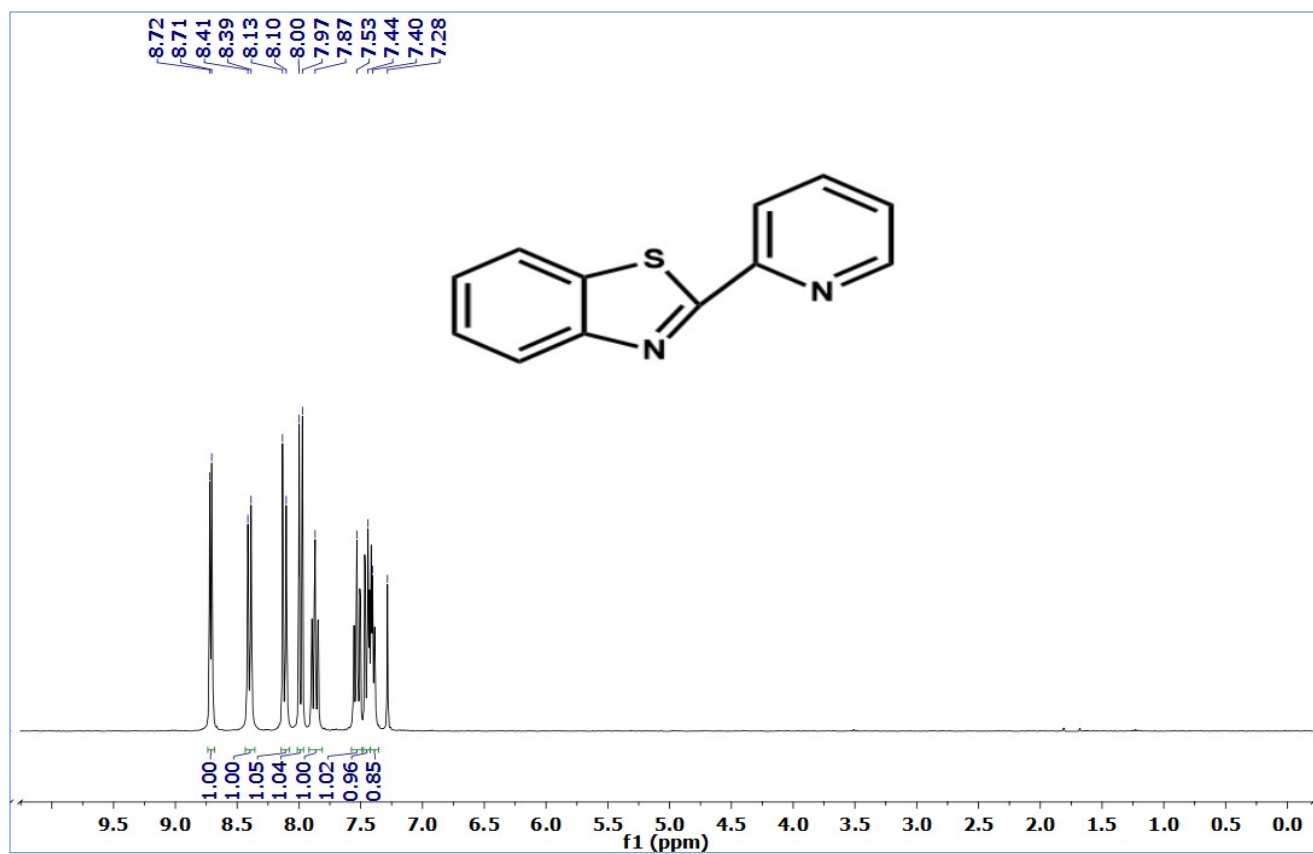

Fig. S1 (A-C)  $^1\text{H-NMR}$  spectrum of (A) APYBT, (B) HPYBT and (C) PYBT inhibitors in  $\text{CDCl}_3$  at 400 MHz

Fig. S2 A

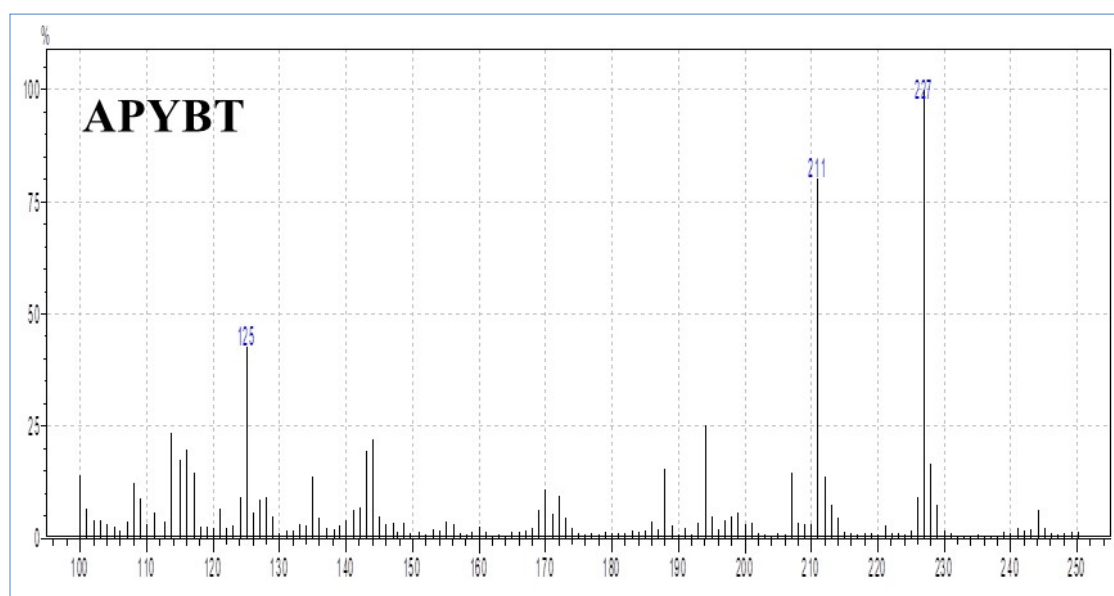

**Fig. S2 B**

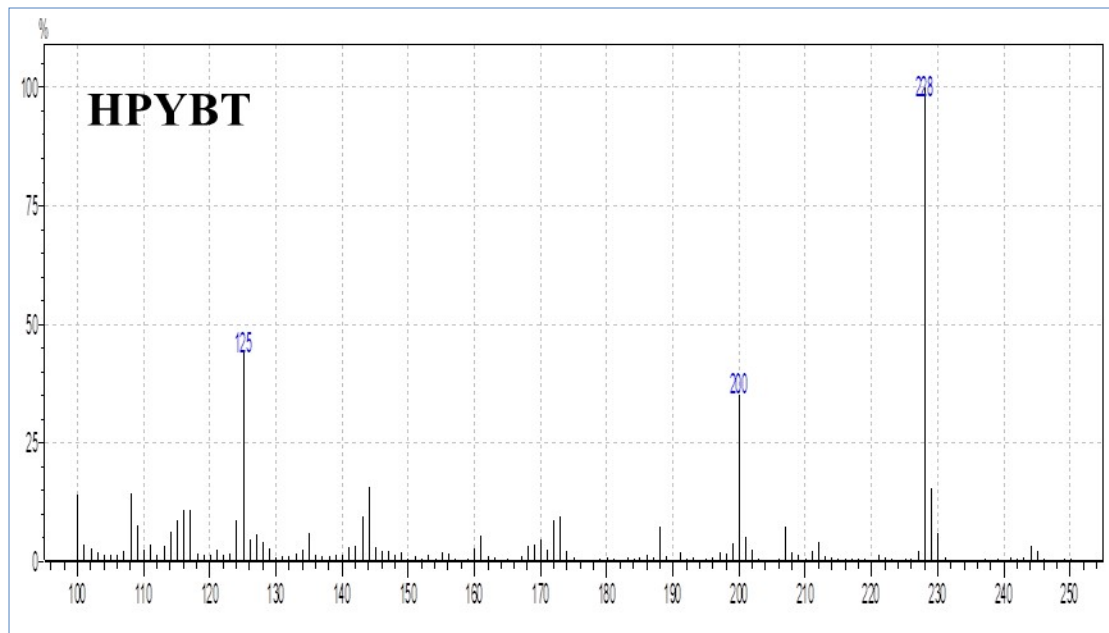

**Fig. S2 C**

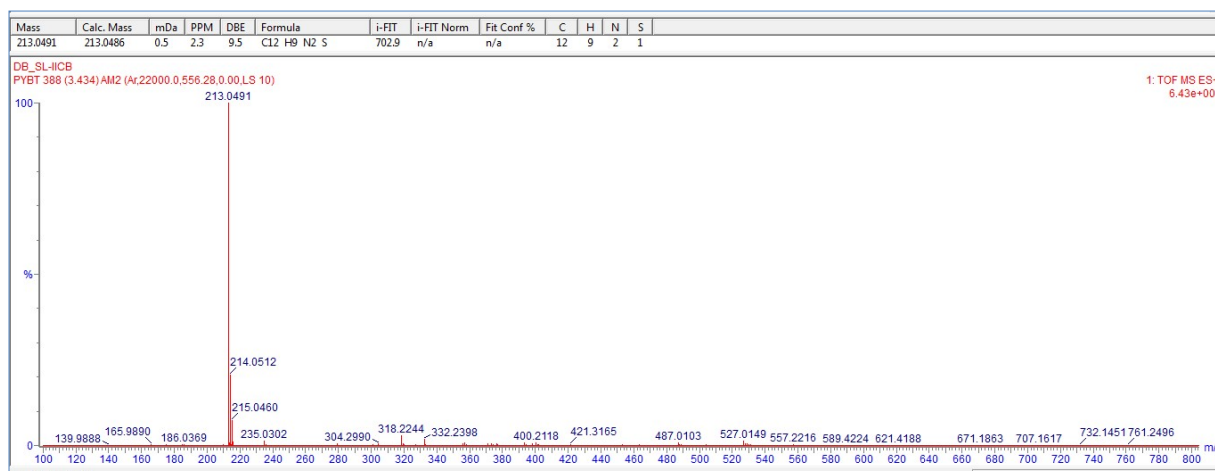

**Fig. S2 (A-C)** EI-MS spectrum of (A) APYBT (B) HPYBT and ESI-MS spectrum of (C) PYBT inhibitors in methanol.

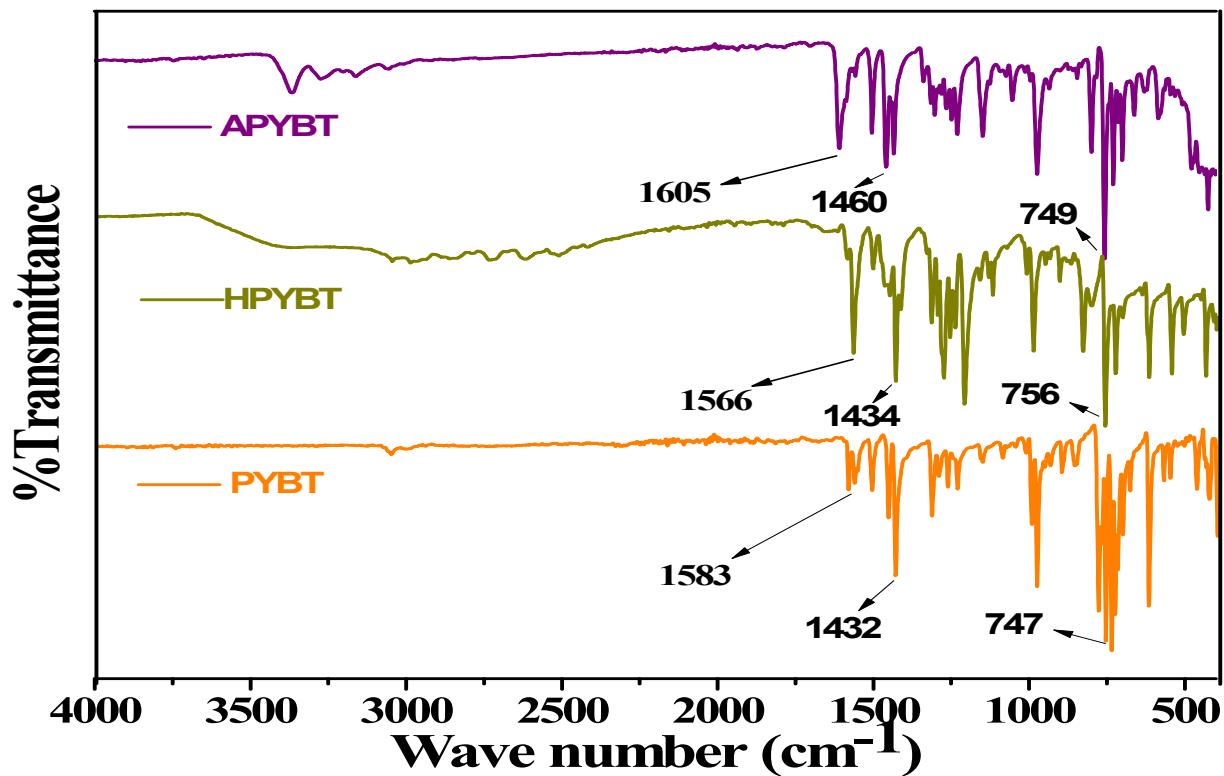

Fig. S3 FTIR spectrum of APYBT, HPYBT and PYBT inhibitors

Fig. S4 A

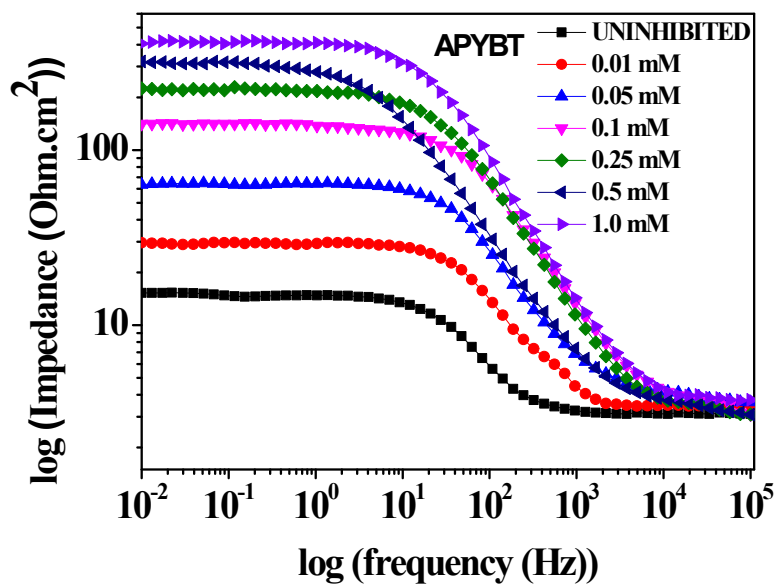

Fig. S4 B

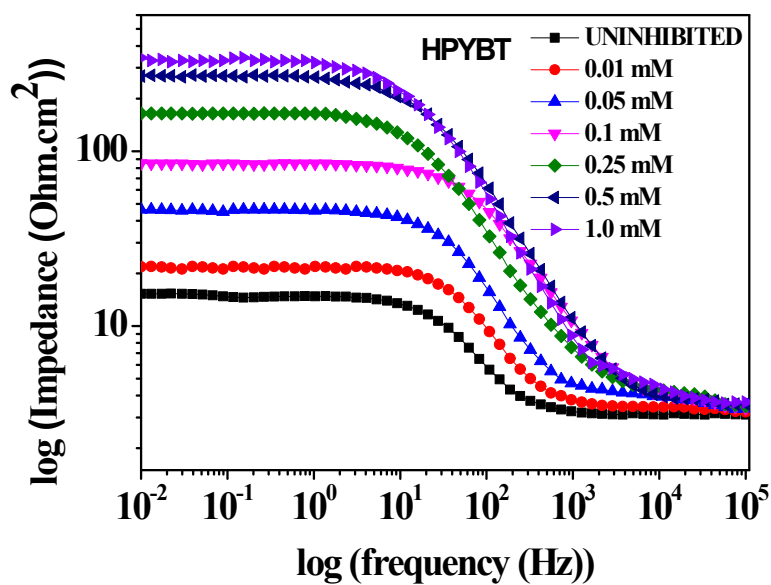

Fig. S4 C

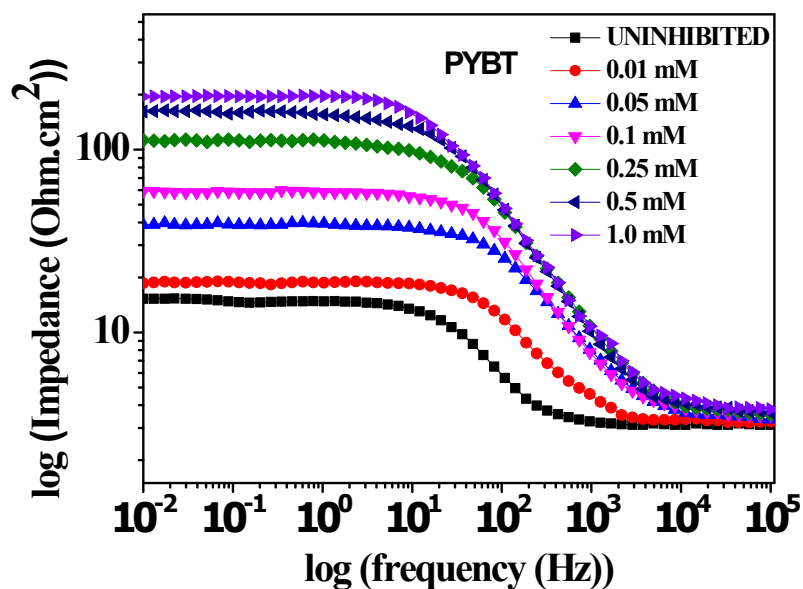

Fig. S4 (A-C) Bode impedance plots of mild steel in 1M HCl containing (A) APYBT (B) HPYBT and (C) PYBT inhibitors.

Fig S5 A

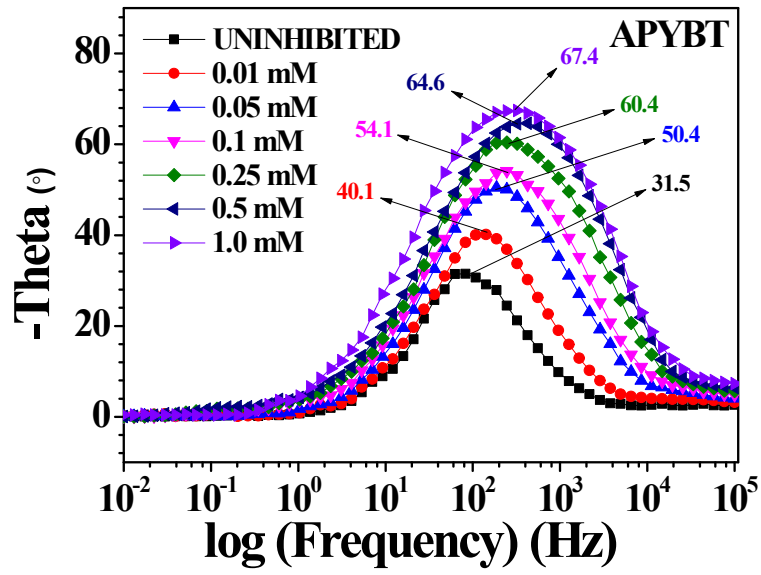

Fig. S5 B

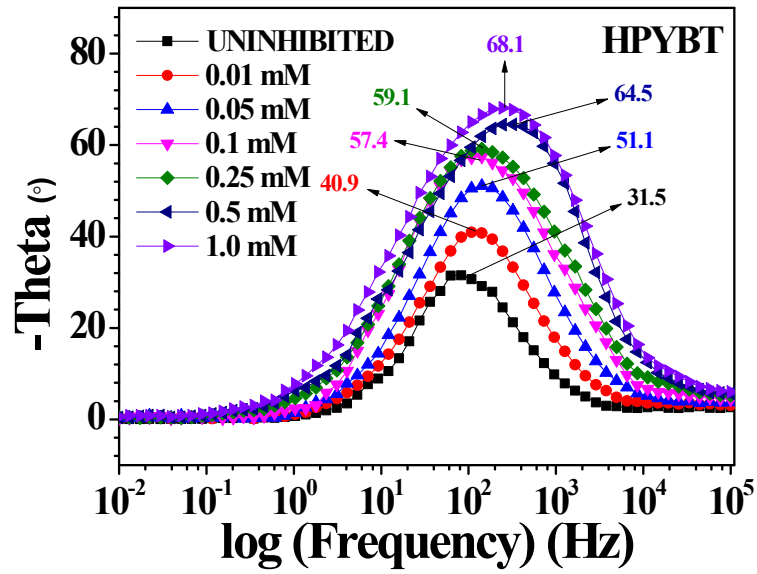

Fig. S5 C

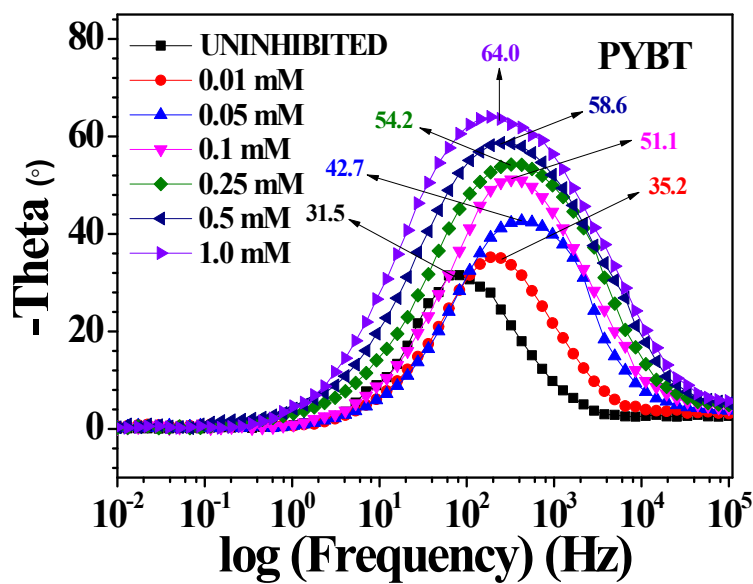

Fig. S5 (A-C) Bode phase angle plots of mild steel in 1M HCl containing (A) APYBT (B) HPYBT and (C) PYBT inhibitors.

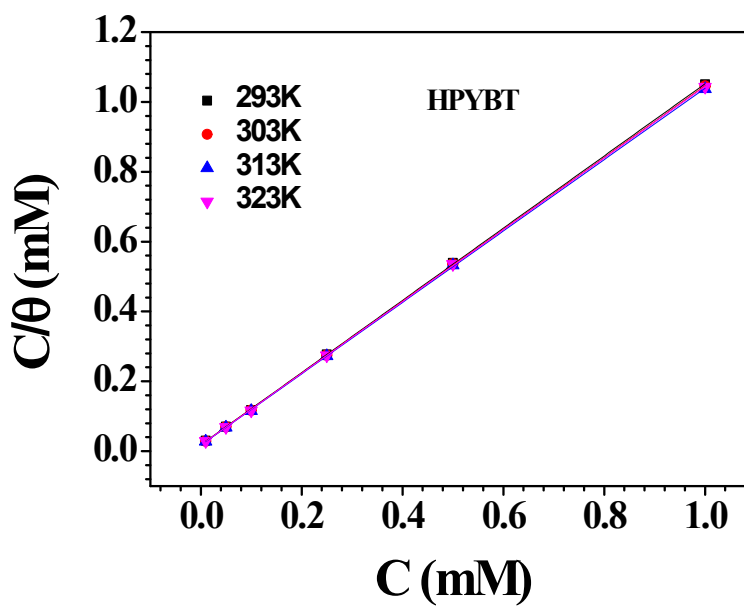

Fig. S6 Langmuir adsorption isotherm for mild steel in 1M HCl with HPYBT inhibitor



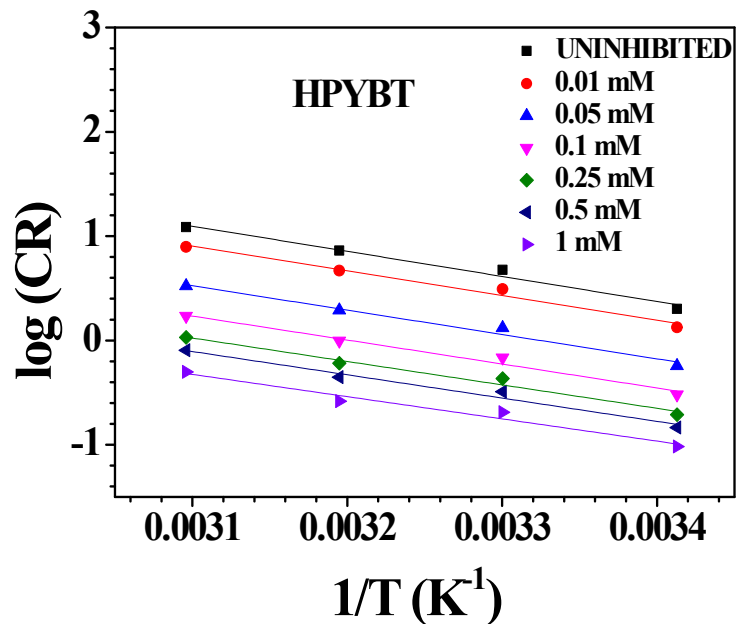

Fig. S7 Arrhenius plots for mild steel in 1M HCl solution with HPYBT inhibitor

Fig. S8 A

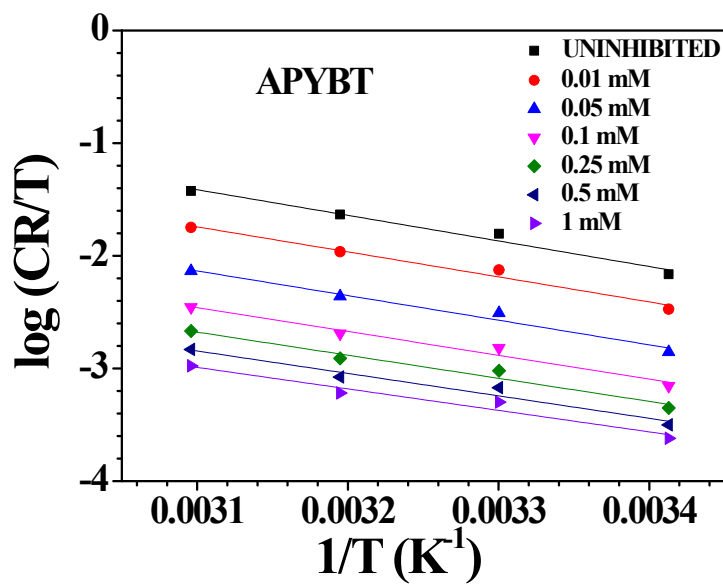

Fig. S8 B

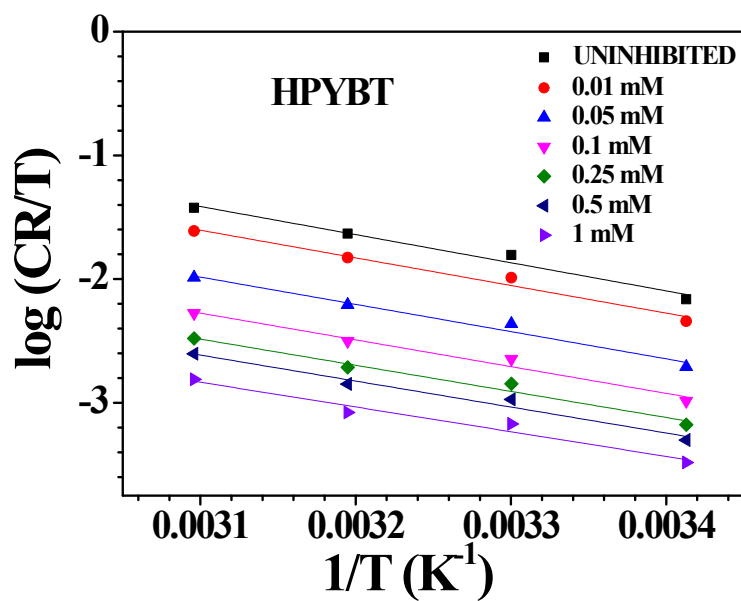

Fig. S8 C

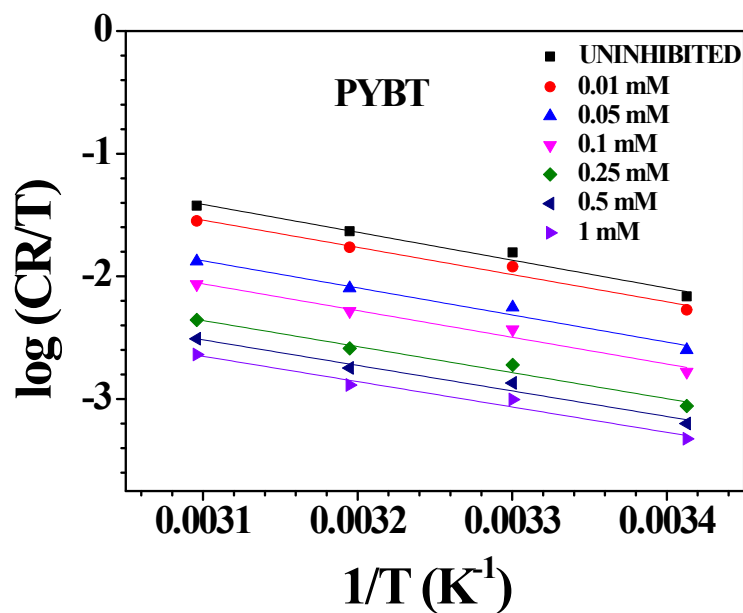

Fig. S8 (A-C) Arrhenius plots for mild steel in 1M HCl containing (A) APYBT, (B) HPYBT and (C) PYBT

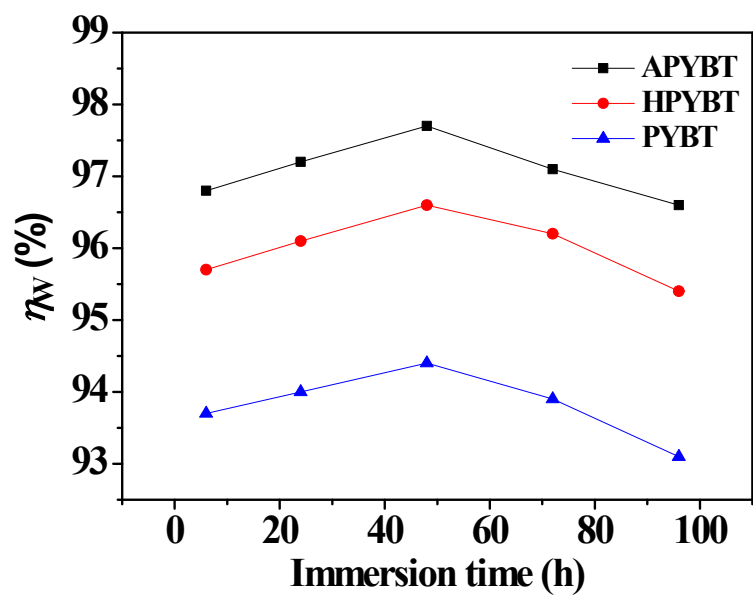

**Fig. S9** Variation of the inhibition efficiency at 1 mM inhibitor concentration against immersion time at 30 °C

**Fig. S10 A**

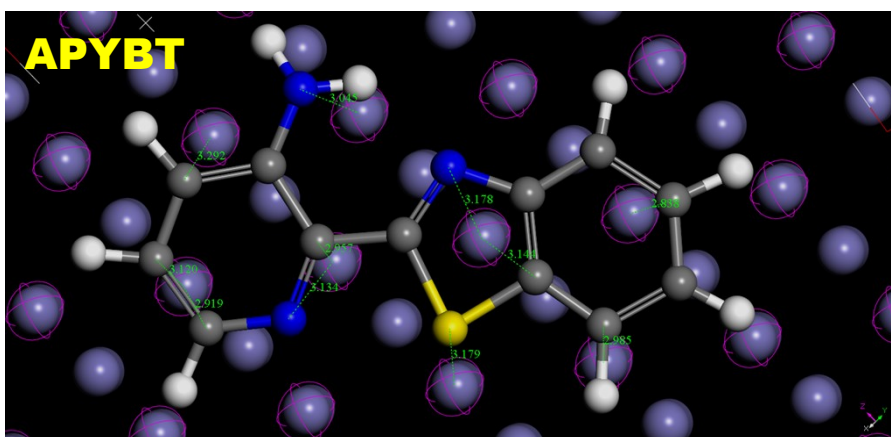

**Fig. S10 B**

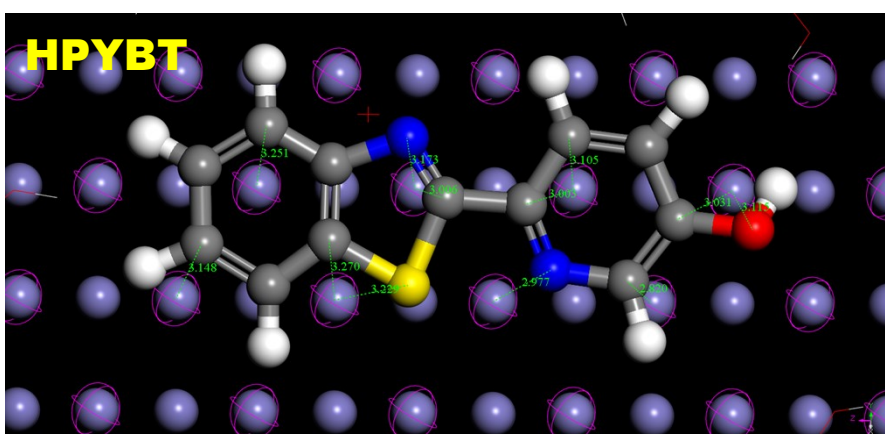

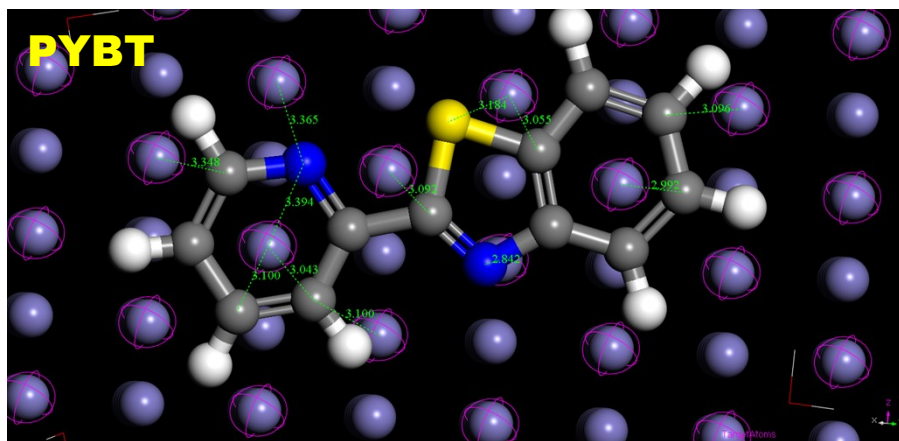

**Fig. S10 (A-C)** Closest distance of mild steel surface and atoms of APYBT, HPYBT & PYBT as obtained from MD simulation study

**Table S1** Corrosion rate of mild steel in 1 M HCl in absence and presence of inhibitors (1 mM concentration) at different exposure times at 30 °C

| Exposure Time (h) | Inhibitor   | Weight loss (mg) | Corrosion Rate (mg cm <sup>-2</sup> h <sup>-1</sup> ) | $\eta_w$ (%) |
|-------------------|-------------|------------------|-------------------------------------------------------|--------------|
| 6                 | UNINHIBITED | 384.9            | 4.752                                                 |              |
|                   | APYBT       | 12.3             | 0.152                                                 | 96.8         |
|                   | HPYBT       | 16.6             | 0.204                                                 | 95.7         |
|                   | PYBT        | 24.2             | 0.299                                                 | 93.7         |
| 24                | UNINHIBITED | 1630.4           | 5.032                                                 |              |
|                   | APYBT       | 45.7             | 0.141                                                 | 97.2         |
|                   | HPYBT       | 63.6             | 0.196                                                 | 96.1         |
|                   | PYBT        | 97.8             | 0.302                                                 | 94.0         |
| 48                | UNINHIBITED | 2547.6           | 3.931                                                 |              |
|                   | APYBT       | 58.6             | 0.090                                                 | 97.7         |
|                   | HPYBT       | 86.6             | 0.134                                                 | 96.6         |
|                   | PYBT        | 142.7            | 0.220                                                 | 94.4         |
| 72                | UNINHIBITED | 2970.3           | 3.056                                                 |              |
|                   | APYBT       | 86.1             | 0.089                                                 | 97.1         |
|                   | HPYBT       | 112.9            | 0.116                                                 | 96.2         |
|                   | PYBT        | 181.2            | 0.186                                                 | 93.9         |
| 96                | UNINHIBITED | 3279.8           | 2.532                                                 |              |
|                   | APYBT       | 111.5            | 0.086                                                 | 96.6         |
|                   | HPYBT       | 150.9            | 0.116                                                 | 95.4         |
|                   | PYBT        | 226.3            | 0.175                                                 | 93.1         |

**Table S2** Calculated Fukui functions of the atoms present in APYBT, HPYBT & PYBT respectively

| Atoms   | APYBT   |         | HPYBT   |         | PYBT    |         |
|---------|---------|---------|---------|---------|---------|---------|
|         | $f_k^+$ | $f_k^-$ | $f_k^+$ | $f_k^-$ | $f_k^+$ | $f_k^-$ |
| C ( 1)  | 0.022   | 0.031   | 0.024   | 0.053   | 0.022   | 0.073   |
| C ( 2)  | 0.025   | 0.031   | 0.026   | 0.047   | 0.026   | 0.059   |
| C ( 3)  | 0.028   | 0.019   | 0.031   | 0.029   | 0.029   | 0.039   |
| C ( 4)  | 0.046   | 0.041   | 0.049   | 0.070   | 0.047   | 0.095   |
| C ( 5)  | 0.025   | 0.029   | 0.027   | 0.045   | 0.026   | 0.059   |
| C ( 6)  | 0.039   | 0.024   | 0.043   | 0.037   | 0.040   | 0.046   |
| C ( 7)  | 0.074   | 0.017   | 0.083   | 0.039   | 0.078   | 0.057   |
| H ( 8)  | 0.015   | 0.012   | 0.017   | 0.018   | 0.016   | 0.024   |
| H ( 9)  | 0.020   | 0.017   | 0.022   | 0.027   | 0.021   | 0.036   |
| H ( 10) | 0.014   | 0.014   | 0.015   | 0.022   | 0.014   | 0.028   |
| H ( 11) | 0.019   | 0.013   | 0.021   | 0.020   | 0.020   | 0.026   |
| N ( 12) | 0.071   | 0.038   | 0.084   | 0.052   | 0.085   | 0.053   |
| S ( 13) | 0.105   | 0.070   | 0.115   | 0.079   | 0.113   | 0.089   |
| C ( 14) | 0.048   | 0.073   | 0.054   | 0.052   | 0.063   | 0.031   |
| C ( 15) | 0.037   | 0.058   | 0.048   | 0.049   | 0.052   | 0.049   |
| N ( 16) | 0.071   | 0.035   | 0.069   | 0.037   | 0.066   | 0.030   |
| C ( 17) | 0.063   | 0.051   | 0.043   | 0.037   | 0.052   | 0.026   |
| C ( 18) | 0.045   | 0.087   | 0.040   | 0.062   | -       | -       |
| H ( 18) | -       | -       | -       | -       | 0.027   | 0.021   |
| C ( 19) | 0.080   | 0.047   | 0.063   | 0.061   | 0.040   | 0.040   |
| H ( 20) | 0.029   | 0.026   | 0.022   | 0.020   | -       | -       |
| C ( 20) | -       | -       | -       | -       | 0.080   | 0.060   |
| H ( 21) | 0.024   | 0.035   | 0.022   | 0.027   | 0.026   | 0.015   |
| H ( 22) | 0.035   | 0.025   | 0.026   | 0.023   | 0.023   | 0.019   |
| N ( 23) | 0.032   | 0.127   | -       | -       | -       | -       |
| O ( 23) | -       | -       | 0.040   | 0.070   | -       | -       |
| H ( 23) | -       | -       | -       | -       | 0.034   | 0.023   |
| H ( 24) | 0.017   | 0.044   | 0.017   | 0.024   | -       | -       |
| H ( 25) | 0.017   | 0.039   | -       | -       | -       | -       |

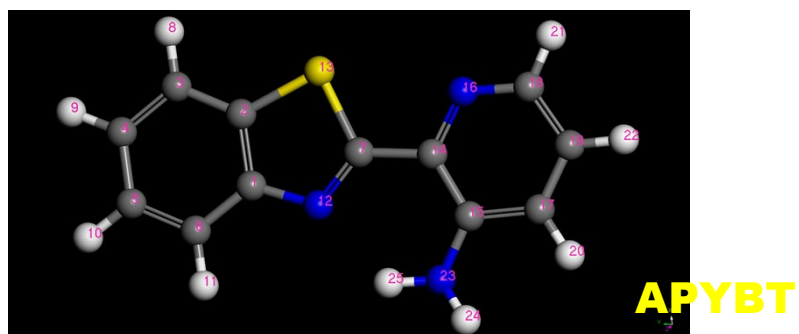

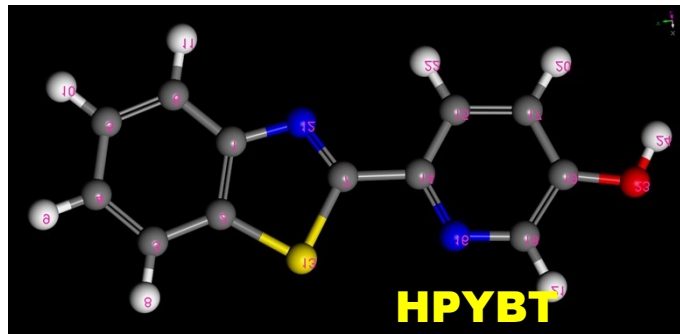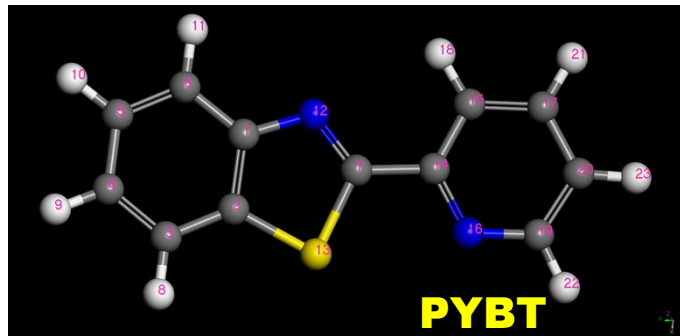

Supplement: d3cp01392h1.pdf [file d3cp01392h1.pdf]
